# Supplementary figures and images for: Identification of distinct N-glycosylation patterns on extracellular vesicles from small-cell and non–small-cell lung cancer cells
Source: PubMed Central journal article supplement — J Biol Chem. 2022 Apr 18;298(6):101950. doi: 10.1016/j.jbc.2022.101950 (PMC9117544; doi:10.1016/j.jbc.2022.101950), 2022-04-18

# Figure S6 (Kondo et al)

A

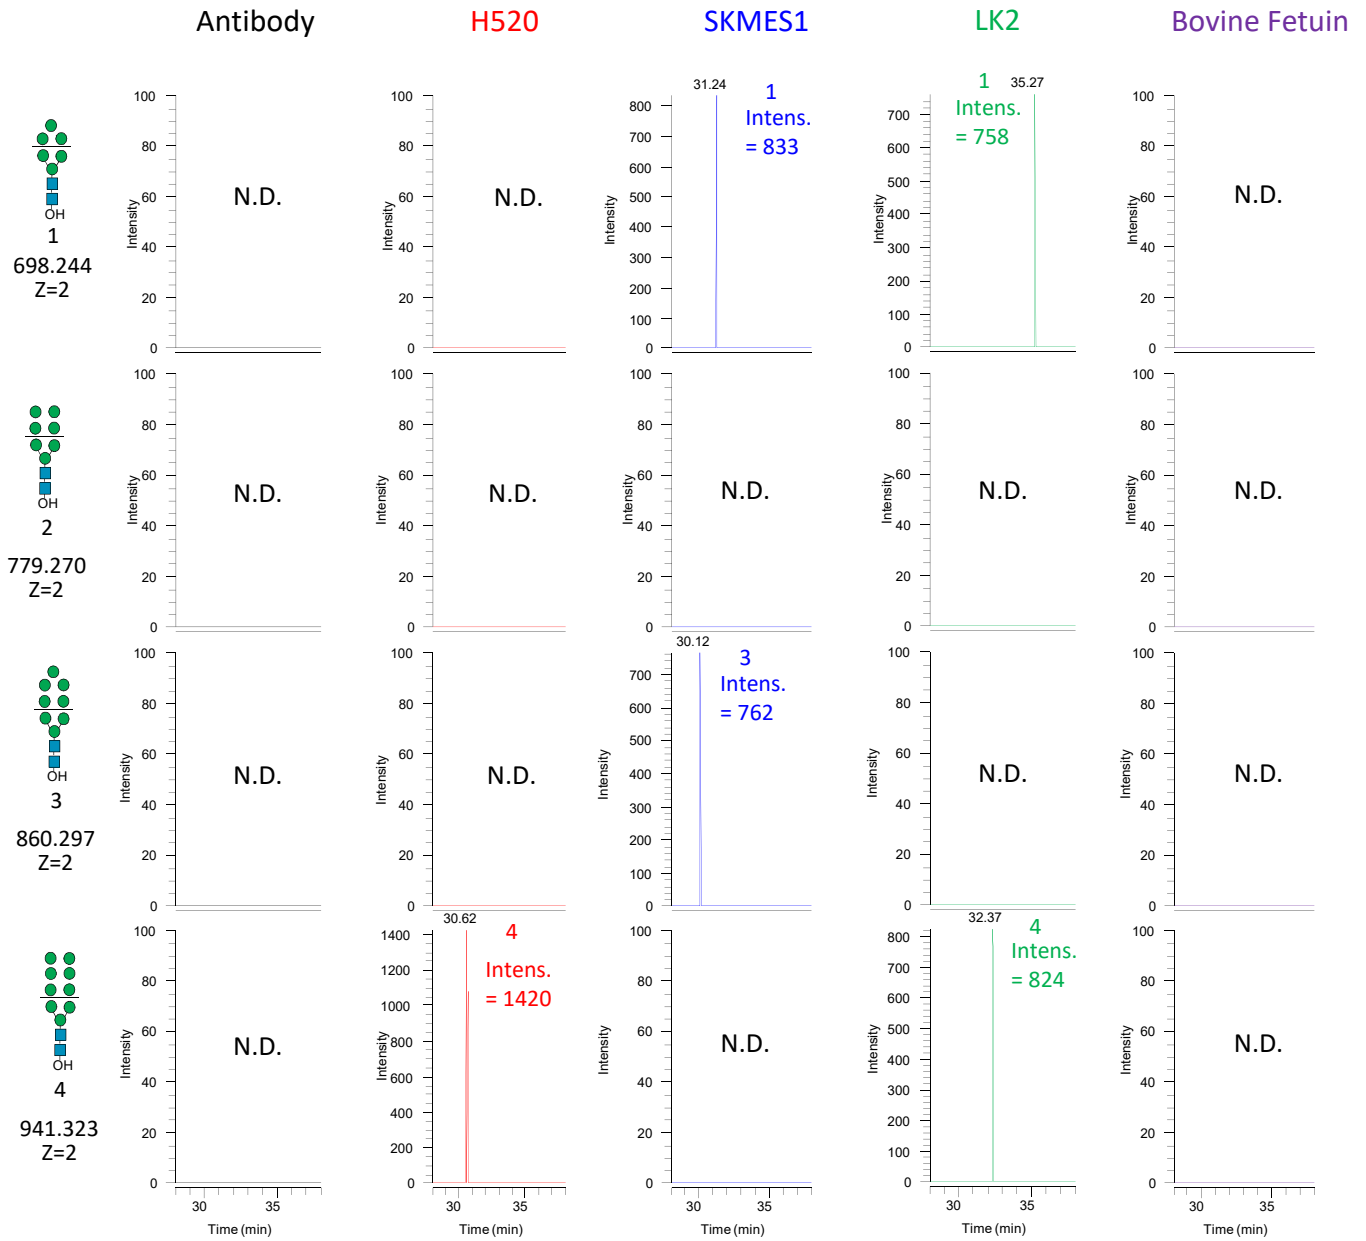

N.D. = not detected

Supplement: mmc10.pdf [file mmc10.pdf]

# Figure S6 (Kondo *et al*), continued

B

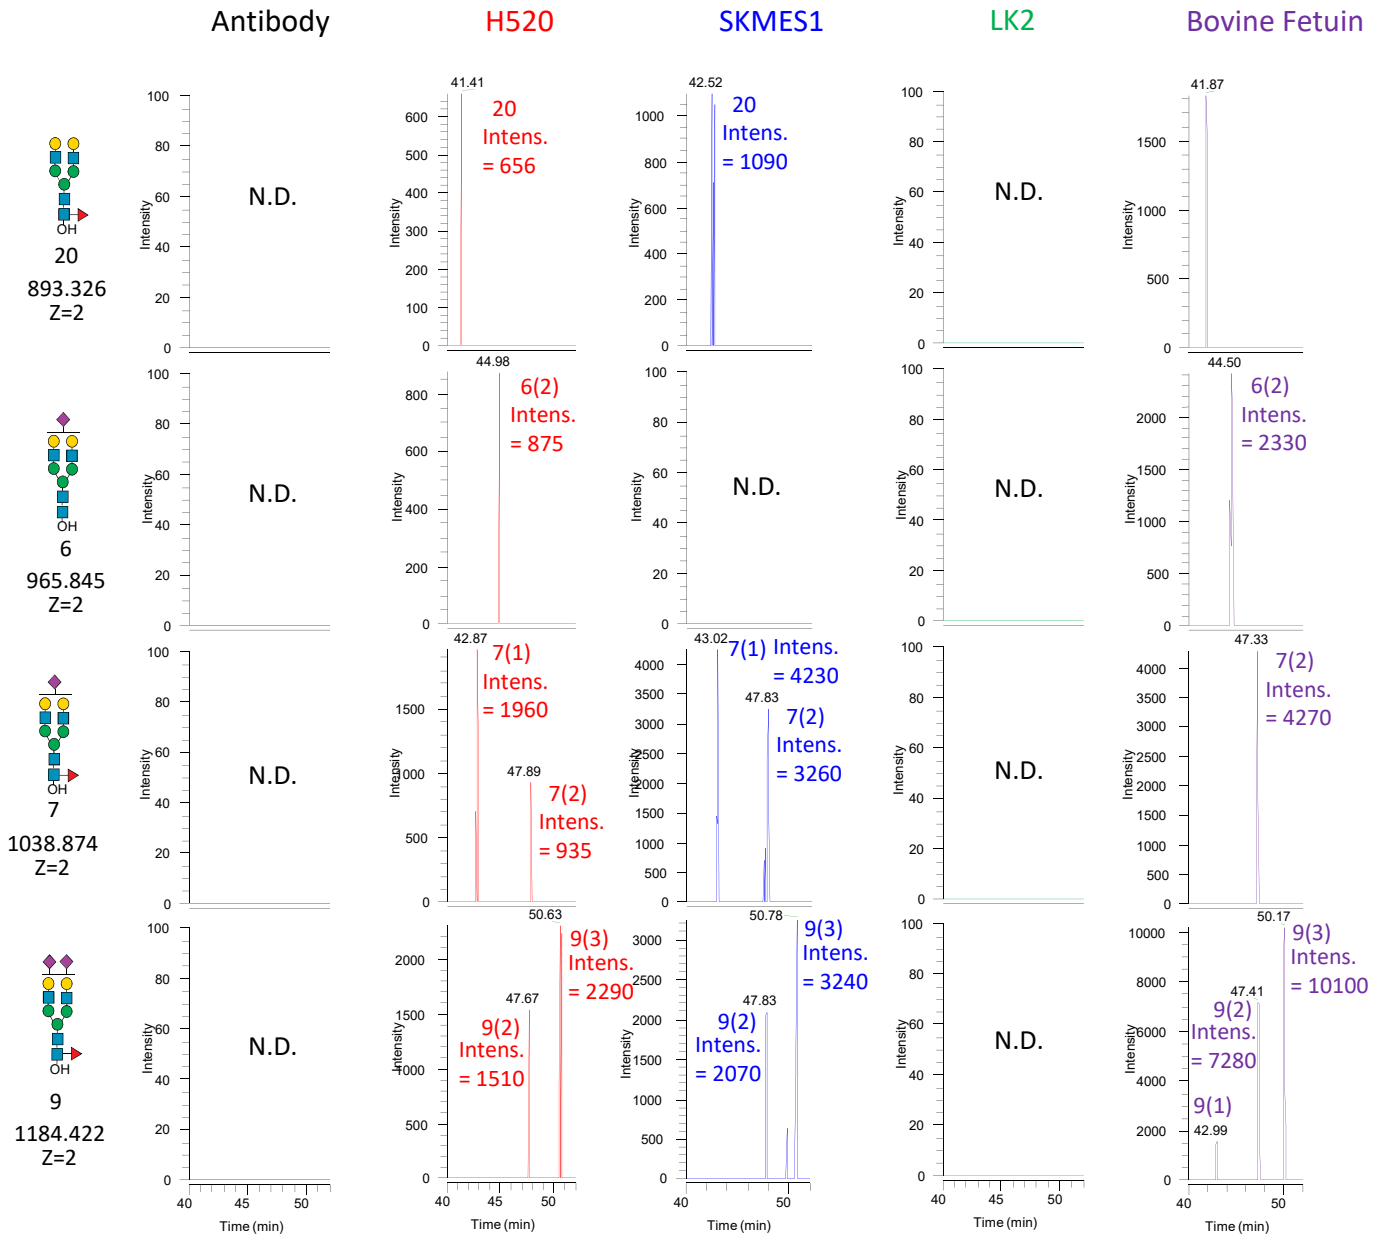

N.D. = not detected

Supplement: mmc11.pdf [file mmc11.pdf]

# Figure S6 (Kondo *et al*), continued

C

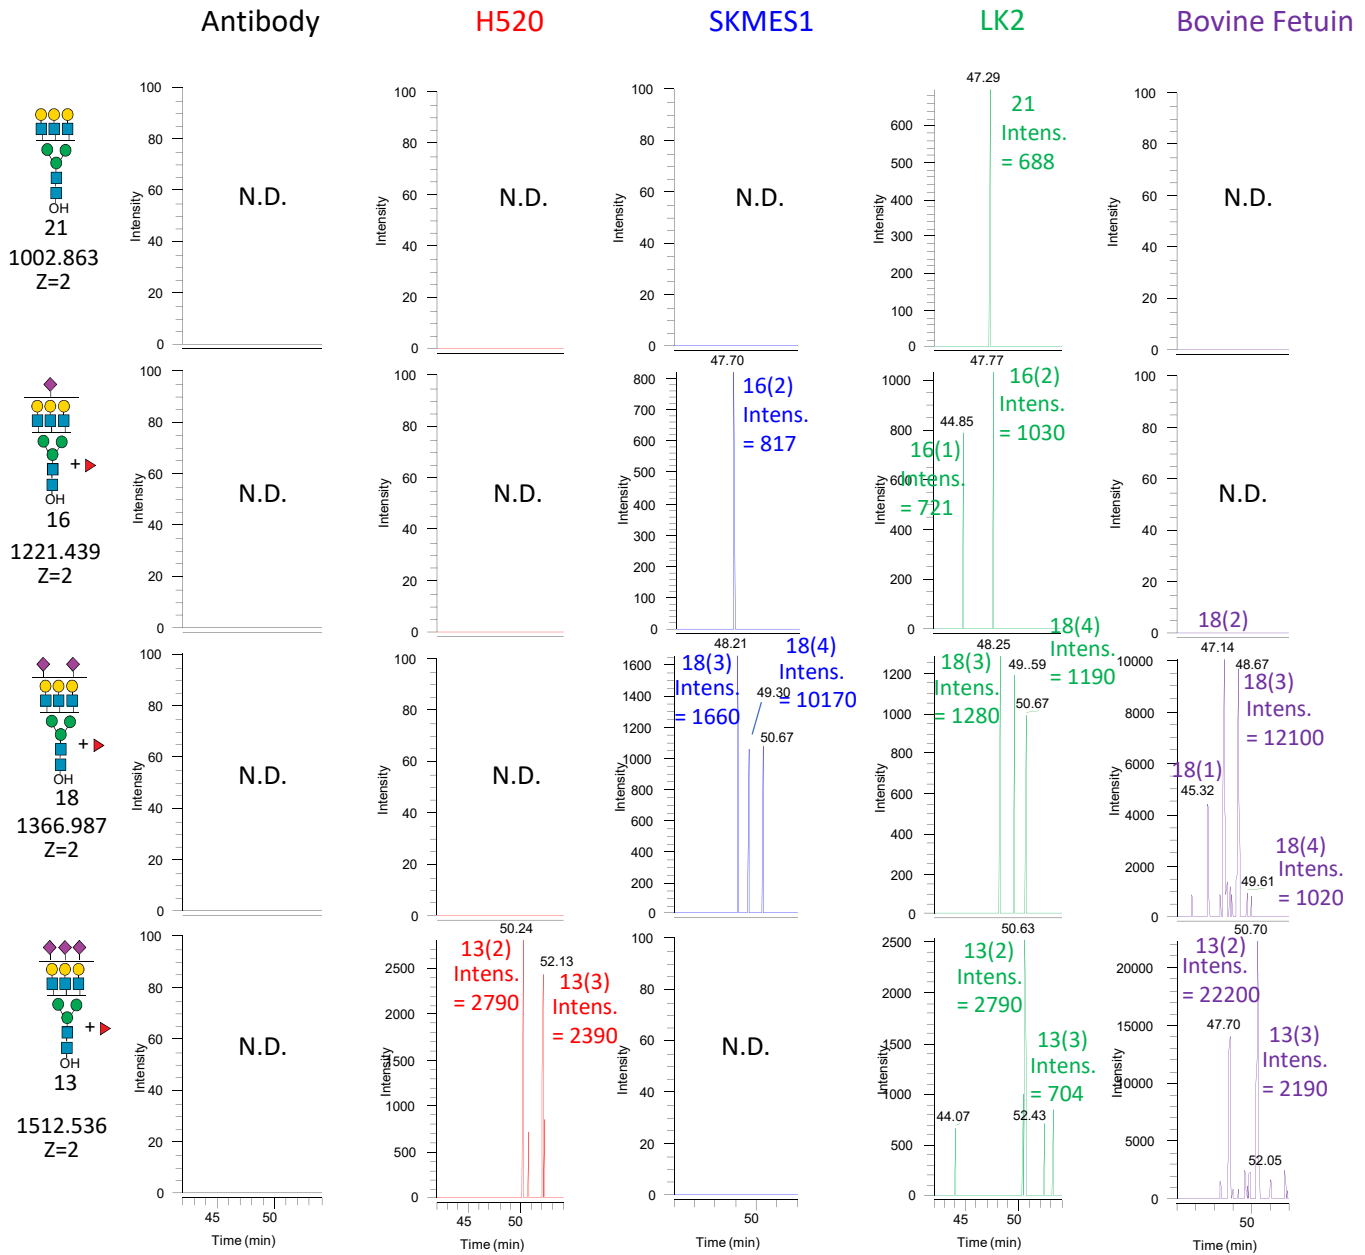

N.D. = not detected

Supplement: mmc12.pdf [file mmc12.pdf]

**Figure S1 (Kondo et al)**

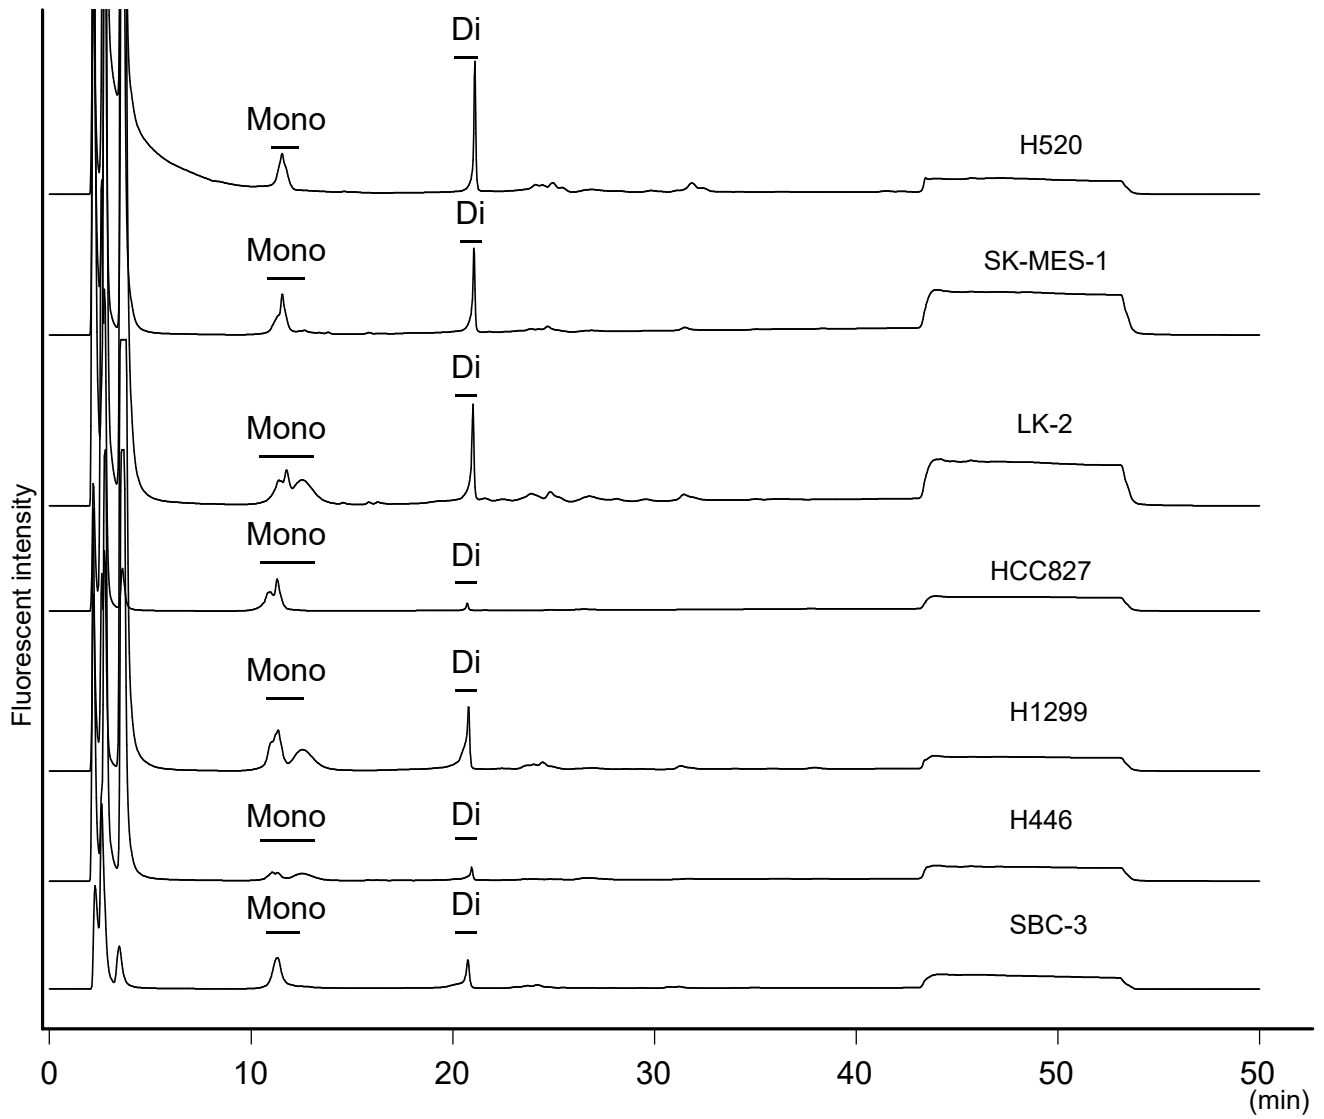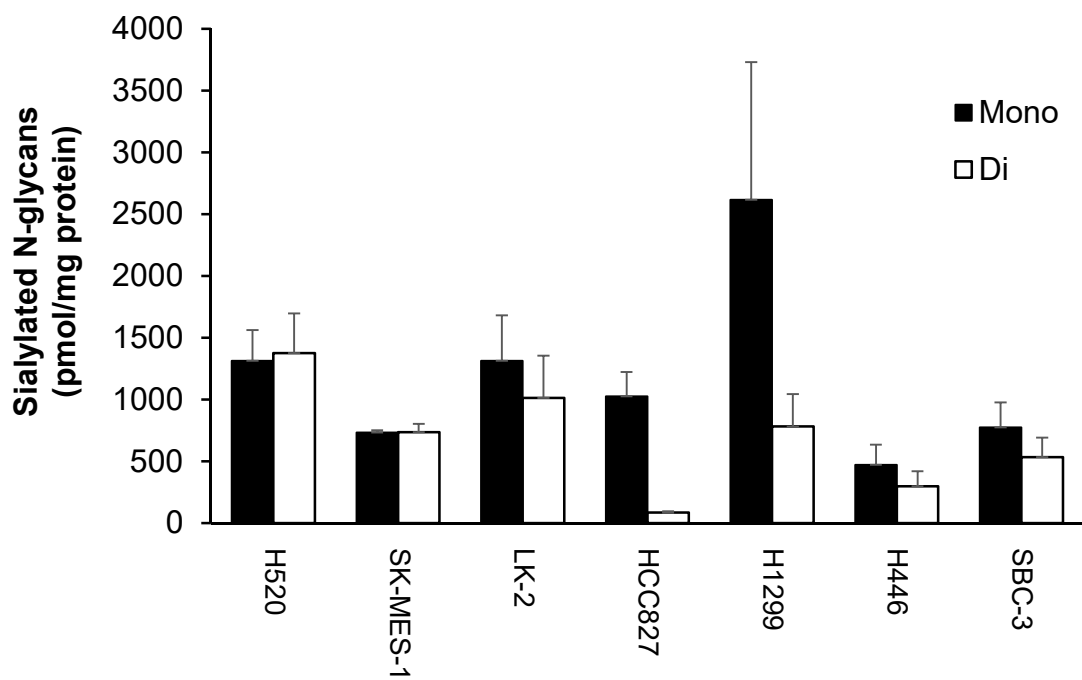

Supplement: mmc5.pdf [file mmc5.pdf]

Figure S2 (Kondo et al)

### H520-sEVs

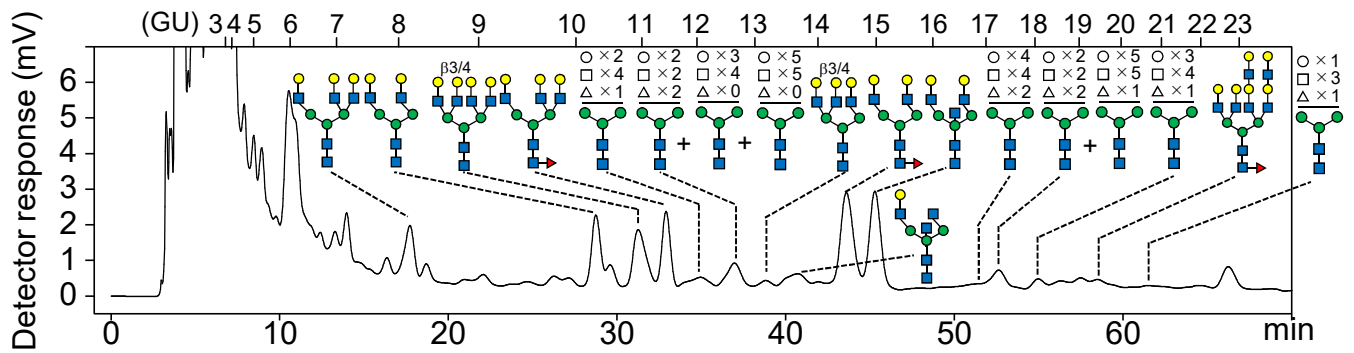

### SK-MES-1-sEVs

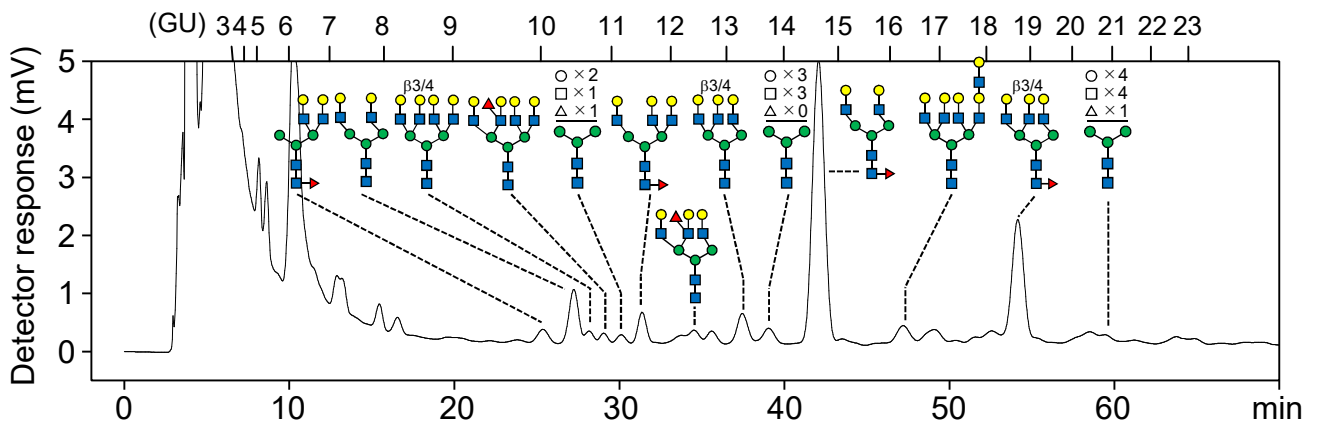

### LK-2-sEVs

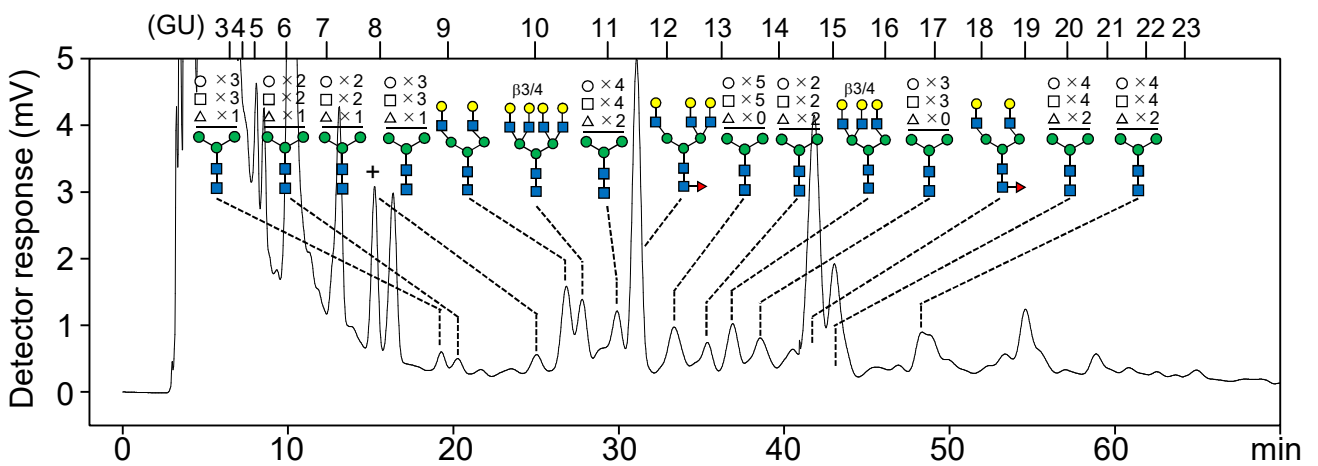

Supplement: mmc6.pdf [file mmc6.pdf]

Figure S3 (Kondo et al)

### H1299-sEVs

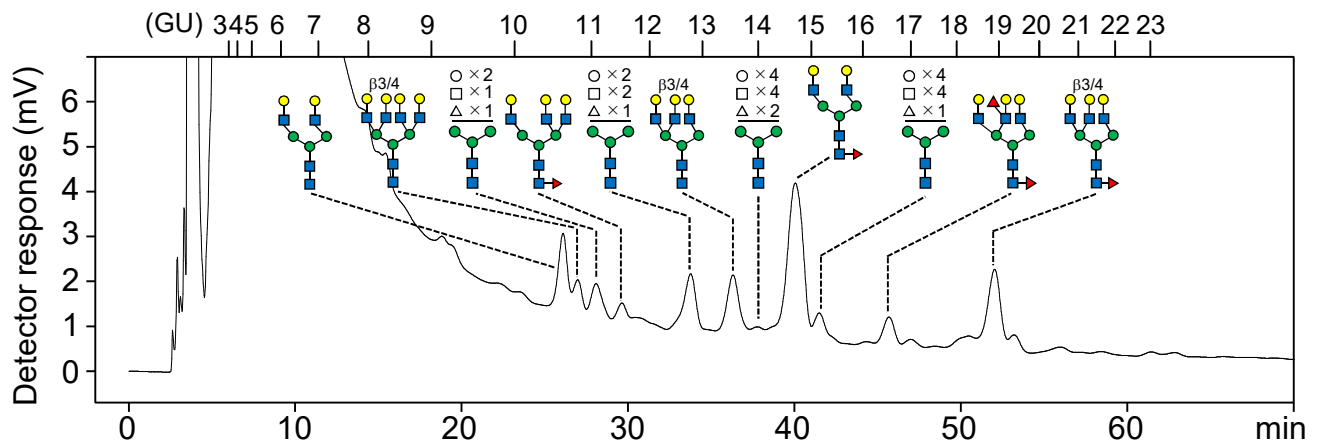

### HCC827-sEVs

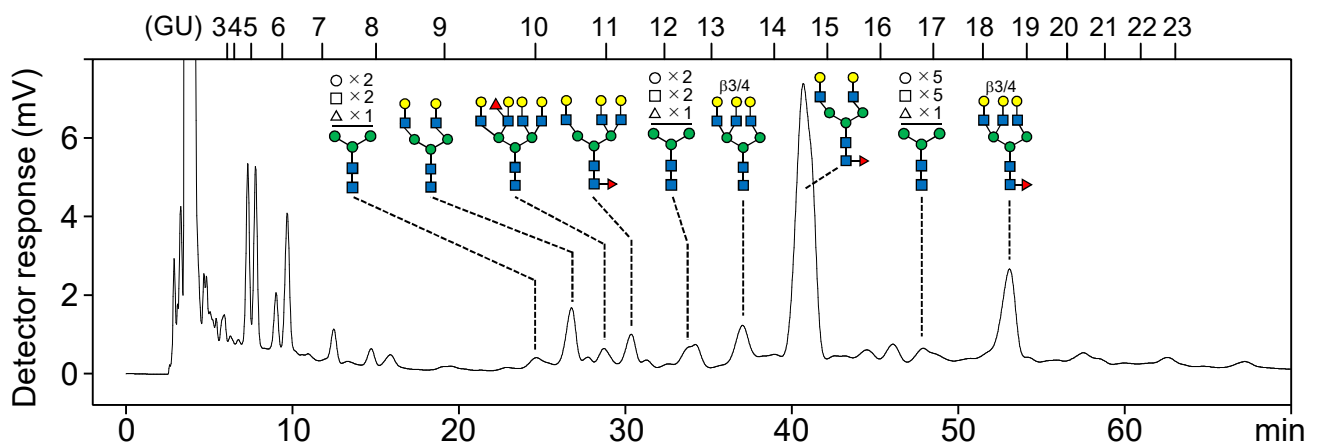

Supplement: mmc7.pdf [file mmc7.pdf]

Figure S4 (Kondo *et al*)

### H446-sEVs

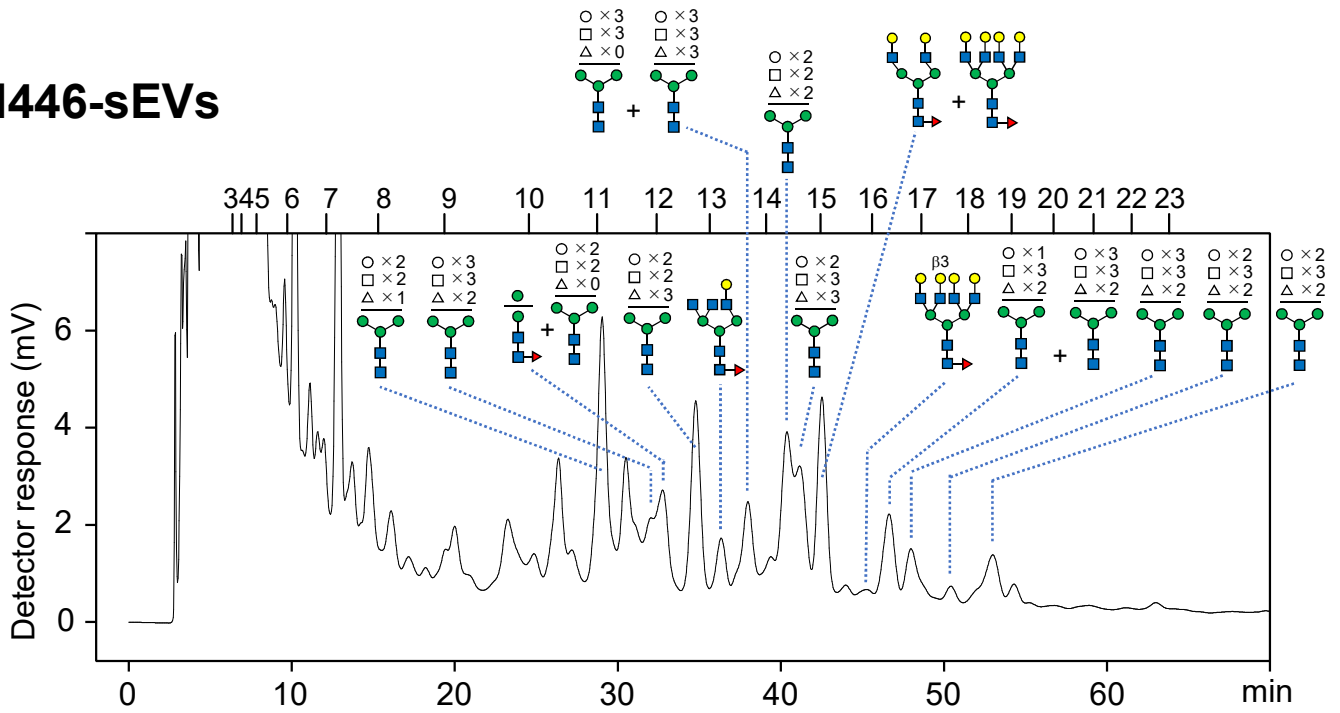

### SBC-3-sEVs

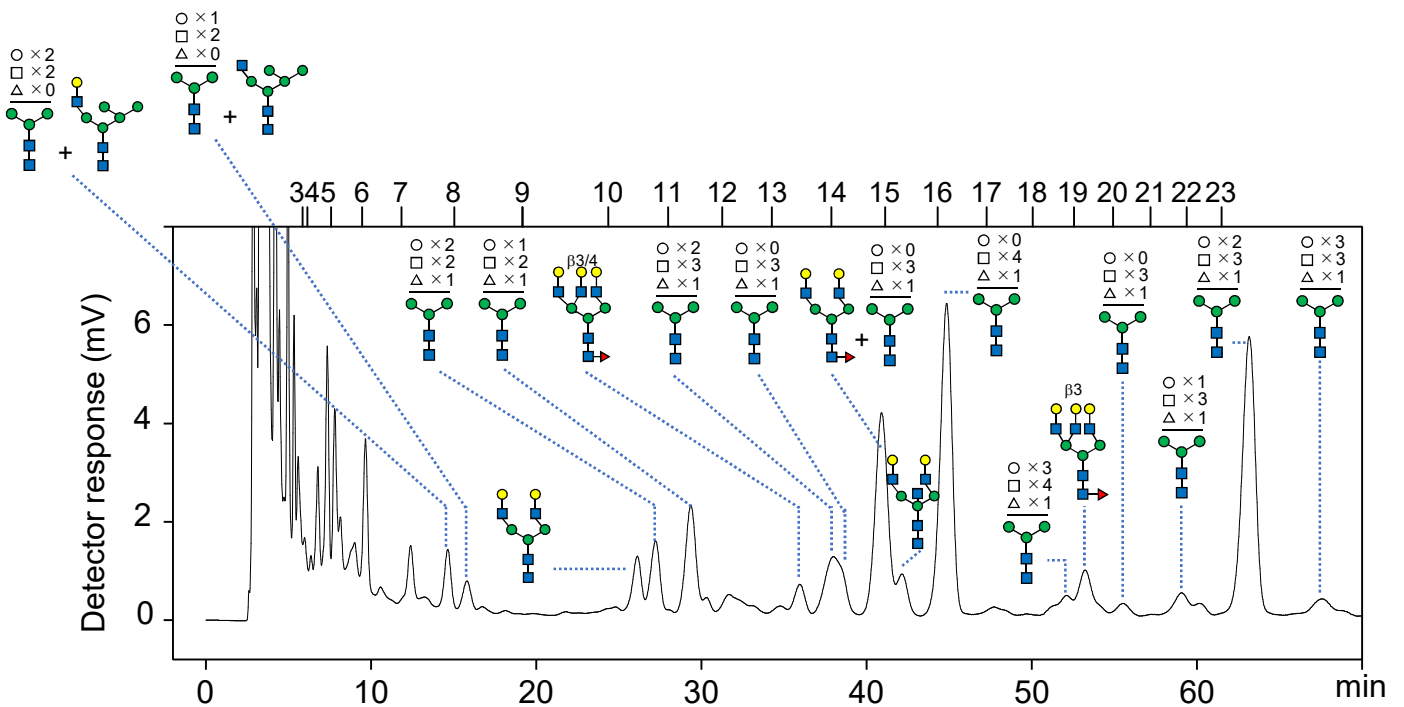

Supplement: mmc8.pdf [file mmc8.pdf]

**Figure S5 (Kondo et al)**

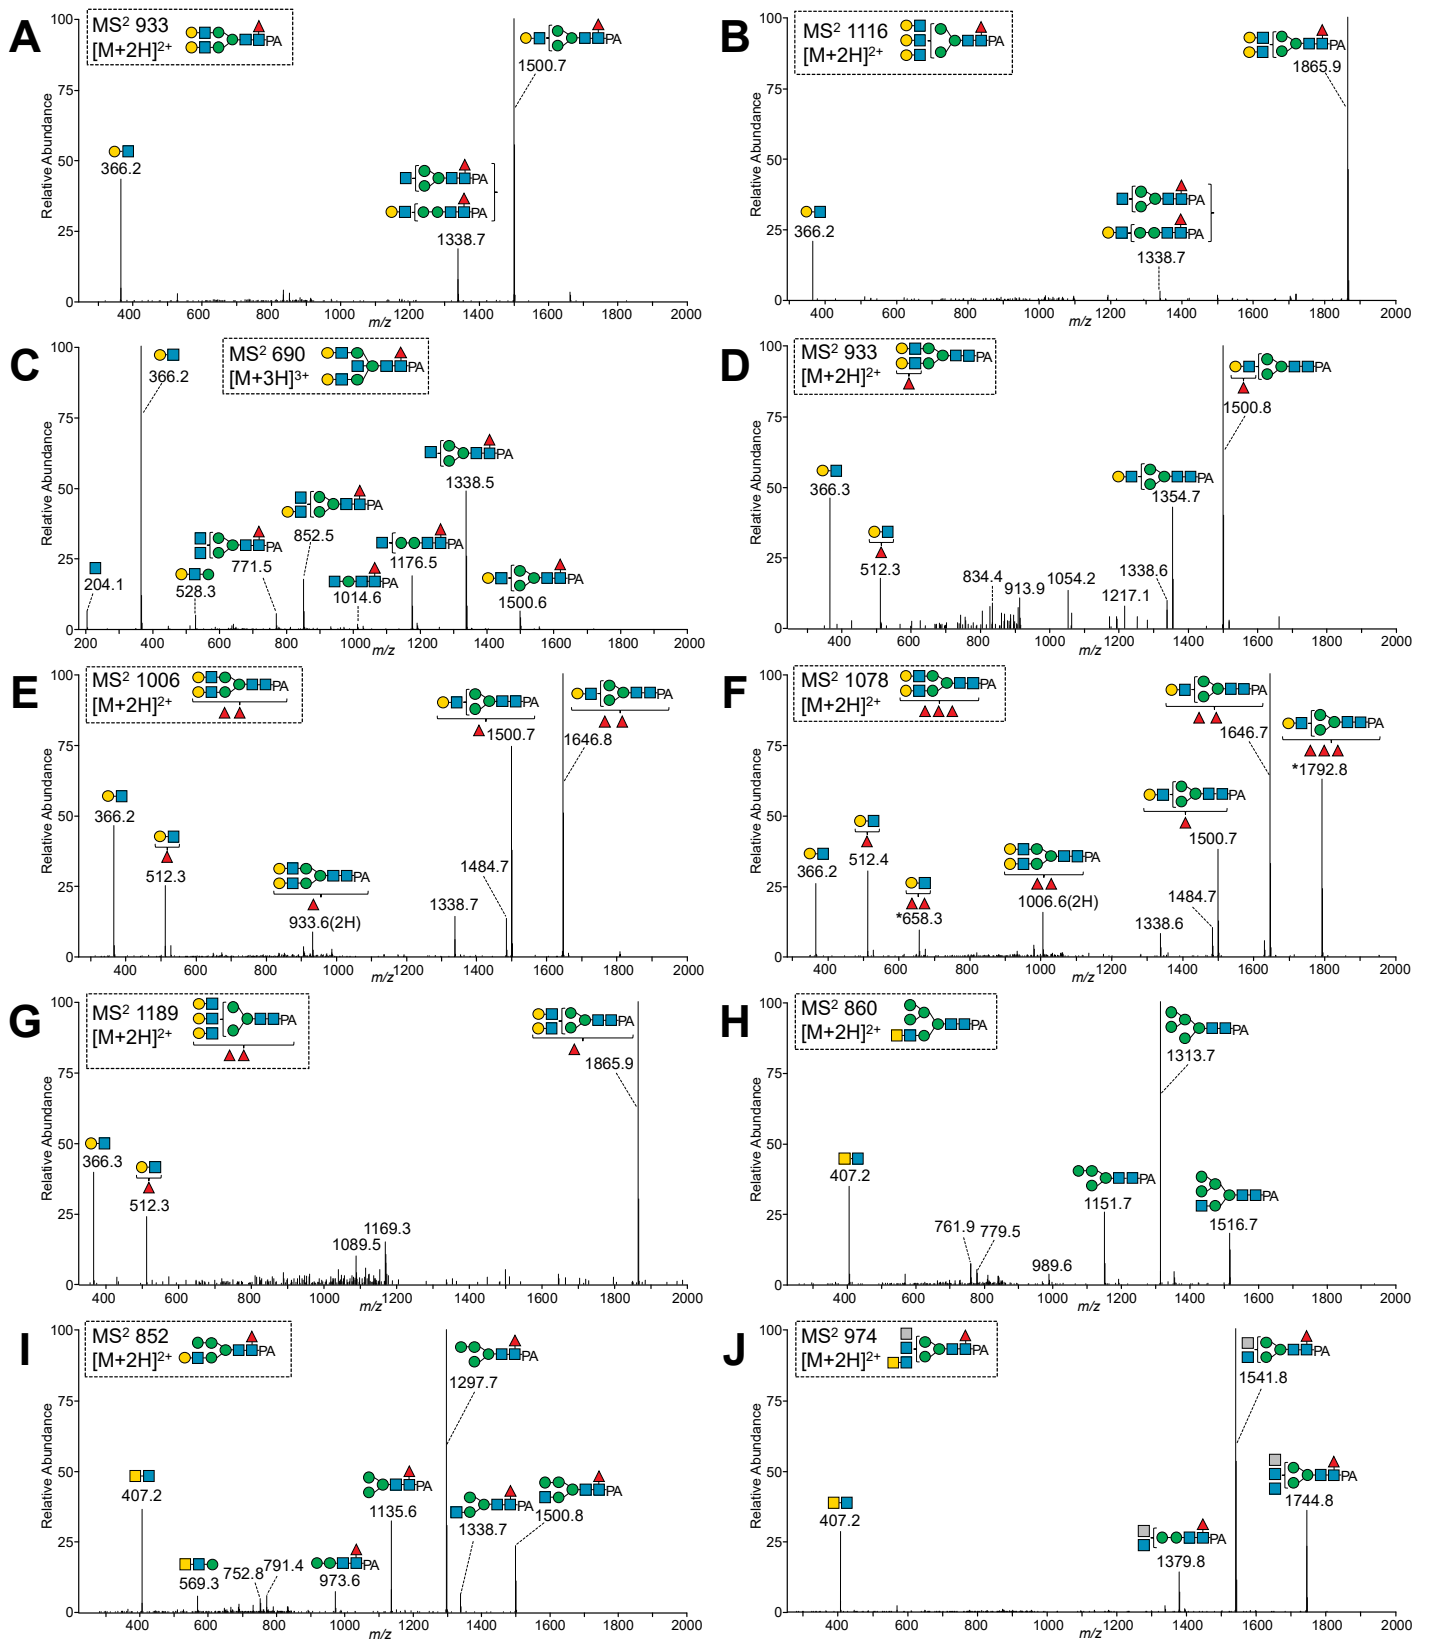

Supplement: mmc9.pdf [file mmc9.pdf]
